# Supplementary material for: Influence of microwave power on the preparation of NiO nanoflakes for enhanced magnetic and supercapacitor applications
Source: Royal Society of Chemistry journal article supplement (doi:10.1039/c4dt03483j), 2015-01-01
Supplement: c4dt03483j1.pdf [file c4dt03483j1.pdf]

## SUPPORTING INFORMATION

### Influence of Microwave Power on preparation of NiO Nanoflakes for enhanced Magnetic and Super capacitor applications

5 G.Anandha babu<sup>a</sup>, G.Ravi<sup>a\*</sup>, T. Mahalingam<sup>b</sup>, M. Kumaresavanji<sup>c</sup> and Y.Hayakawa<sup>d</sup>

Received (in XXX, XXX) Xth XXXXXXXXXX 20XX, Accepted Xth XXXXXXXXXX 20XX  
DOI: 10.1039/b000000x

10 Figure S1 A) XRD, B) FTIR spectra of as prepared Ni(OH)<sub>2</sub> sample for a) 900 W, b) 600 W, c) 450 W  
and d) 300 W and C) thermal analysis (TG/DTA) curve of as prepared sample

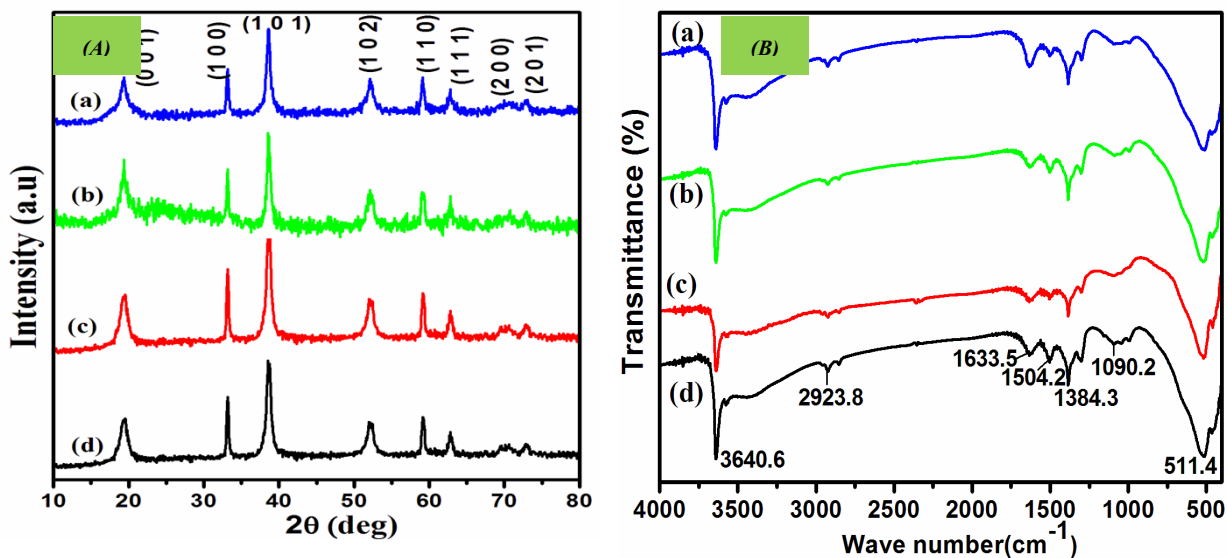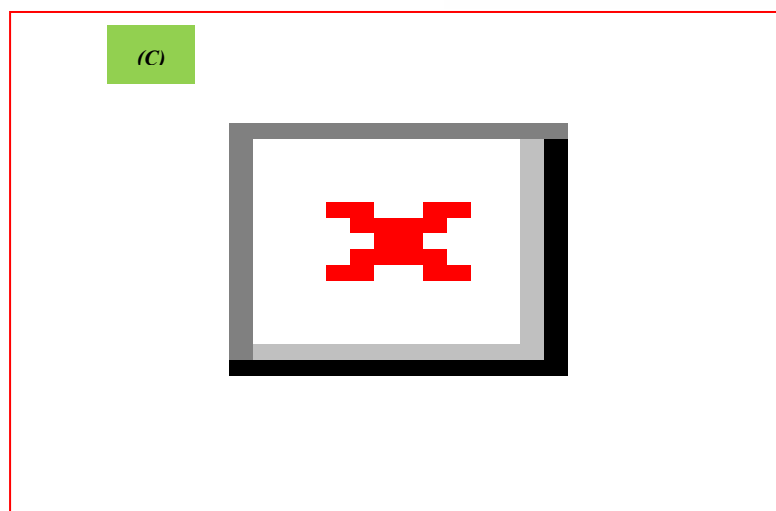

Figure S2 Low magnification FESEM images of NiO sample for the power of a) 900 W, b) 600 W, c) 450 W and d) 300 W respectively.

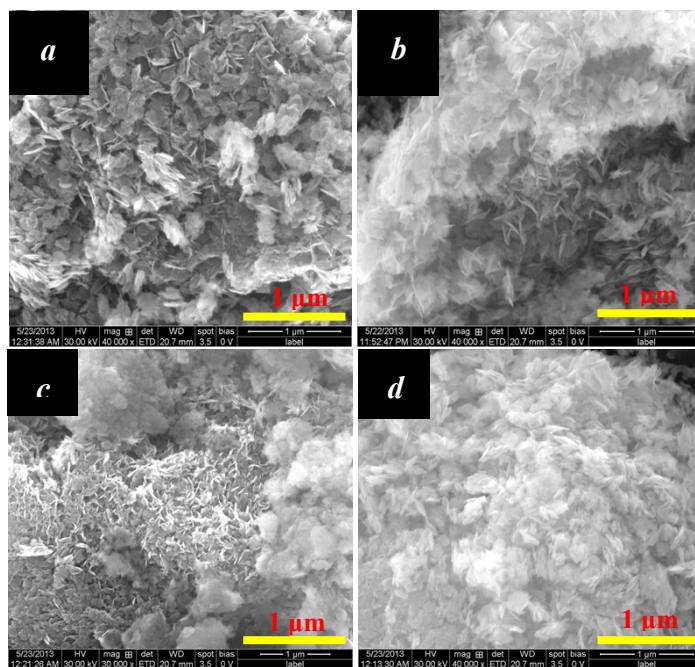

Table T1 lattice parameters of as prepared Ni(OH)<sub>2</sub> samples

| Sample | Lattice parameters (Å) |          | Cell volume (Å <sup>3</sup> ) |
|--------|------------------------|----------|-------------------------------|
|        | <i>a</i>               | <i>c</i> |                               |
| 900 W  | 3.118                  | 5.401    | 45.49                         |
| 600 W  | 3.119                  | 5.403    | 45.53                         |
| 450 W  | 3.120                  | 5.405    | 45.58                         |
| 300 W  | 3.125                  | 5.413    | 45.78                         |
